# Supplementary material for: Discounting of Hyper-Palatable Food and Money: Associations with Food Addiction Symptoms
Source: MDPI journal article supplement (doi:10.3390/nu15184008), 2023-09-16
Supplement: s1 [file s1]

**Table S1.** Pearson Correlations between Single and Cross-commodity Conditions and Small Magnitude Conditions and YFAS Symptom Score.

| Conditions         | HPF vs. HPF | HPF vs. Money | Money vs. HPF | Money vs. Money |
|--------------------|-------------|---------------|---------------|-----------------|
| HPF vs. HPF        |             |               |               |                 |
| HPF vs. Money      | 0.32 ****   |               |               |                 |
| Money vs. HPF      | 0.31 ****   | −0.13         |               |                 |
| Money vs. Money    | 0.35 ****   | 0.52 ****     | 0.20 **       |                 |
| YFAS Symptom Count | 0.01        | 0.13          | −0.08         | 0.18 *          |

*Note:* HPF = Hyper-Palatable Food, YFAS = Yale Food Addiction Scale;  $p < 0.0001$ , \*\*\*\*,  $p < 0.01$ , \*\*,  $p < 0.05$ , \*.

**Table S2.** Pearson Correlations between Single and Cross-commodity Conditions and Large Magnitude Conditions and YFAS Symptom Score.

| Conditions         | HPF vs. HPF | HPF vs. Money | Money vs. HPF | Money vs. Money |
|--------------------|-------------|---------------|---------------|-----------------|
| HPF vs. HPF        |             |               |               |                 |
| HPF vs. Money      | 0.18 *      |               |               |                 |
| Money vs. HPF      | 0.39 ****   | −0.14         |               |                 |
| Money vs. Money    | 0.36 ****   | 0.56 ****     | 0.14          |                 |
| YFAS Symptom Count | 0.03        | 0.18 *        | −0.19         | 0.12            |

*Note:* HPF = Hyper-Palatable Food, YFAS = Yale Food Addiction Scale;  $p < 0.0001$ , \*\*\*\*,  $p < 0.05$ , \*.

**Table S3.** Zero-Inflated Negative Binomial Regression with Large Magnitude Discounting Conditions and Food Addiction Symptomology (N = 285).

| Condition              | Model<br>(Count/Logit) | IRR/OR (95% CI)  | SE   | <i>p</i> Value |
|------------------------|------------------------|------------------|------|----------------|
| <b>HPF vs. HPF</b>     | Count                  | 1.04 (0.99–1.11) | 0.03 | 0.207          |
|                        | Logit                  | 1.04 (0.96–2.35) | 0.04 | 0.346          |
| <b>Money vs. HPF</b>   | Count                  | 0.95 (0.90–1.00) | 0.03 | 0.059          |
|                        | Logit                  | 1.06 (0.96–1.15) | 0.04 | 0.174          |
| <b>HPF vs. Money</b>   | Count                  | 1.05 (0.94–1.13) | 0.05 | 0.316          |
|                        | Logit                  | 0.90 (0.31–1.02) | 0.06 | 0.071          |
| <b>Money vs. Money</b> | Count                  | 1.02 (0.94–1.11) | 0.04 | 0.735          |
|                        | Logit                  | 0.89 (0.57–1.02) | 0.06 | 0.063          |

*Note:* Hunger was included as a covariate in all models. CI = Confidence Interval; HPF = Hyper-Palatable Food; IRR = Incidence Rate Ratio; OR = Odds Ratio; Logit refers to binary portion of the zero-inflated negative binomial model.

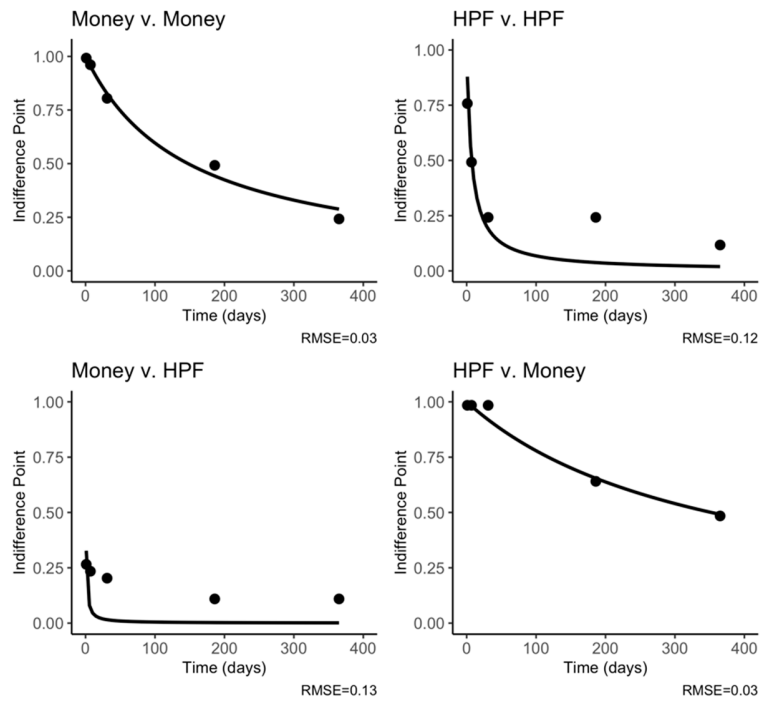

**Figure S1.** The median indifference point as a function of delay in days for small magnitude conditions using Mazur (1987) hyperbolic model. *Note:* RMSE = Root Mean Squared Error.

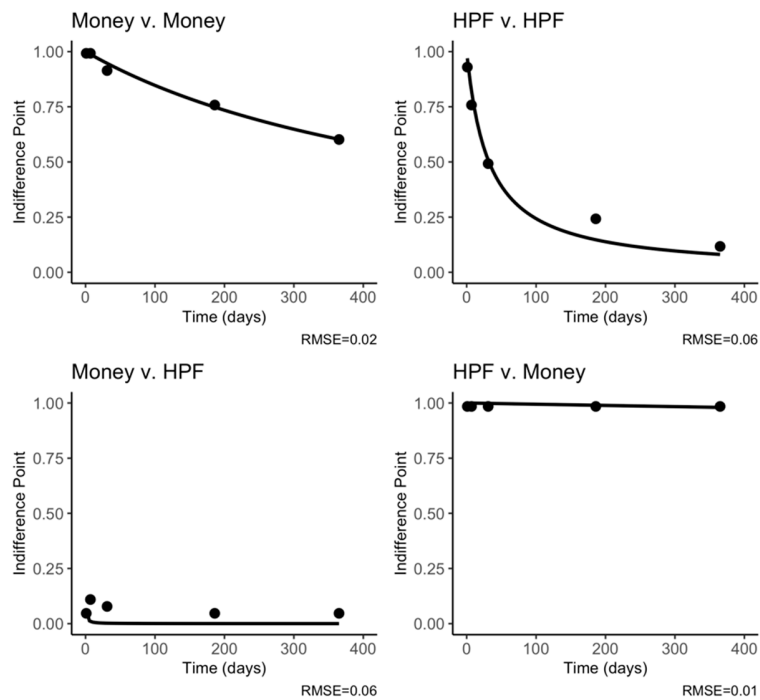

**Figure S2:** The median indifference point as a function of delay in days for large magnitude conditions using Mazur (1987) hyperbolic model. *Note:* RMSE = Root Mean Squared Error.
